# Supplementary material for: Lack of TRPV1 aggravates obesity-associated hypertension through the disturbance of mitochondrial Ca2+ homeostasis in brown adipose tissue
Source: PubMed Central journal article supplement (PMC9010289; doi:10.1038/s41440-021-00842-8), 2022-01-18

# Supplementary Figure 1

**A**

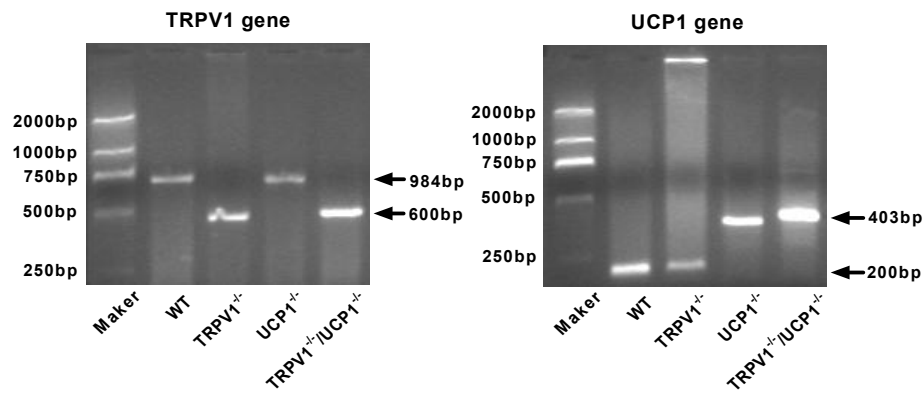

**B**

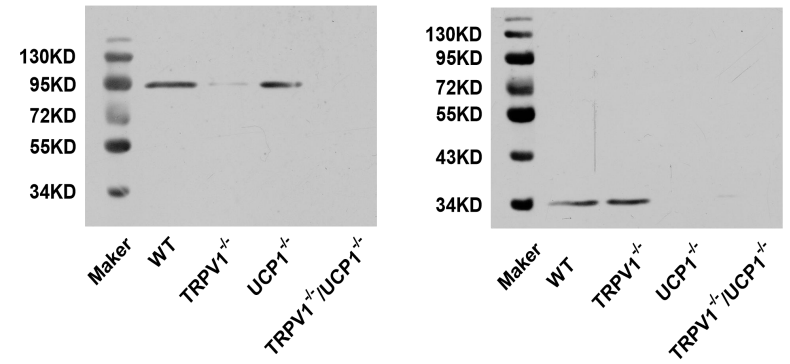

**C**

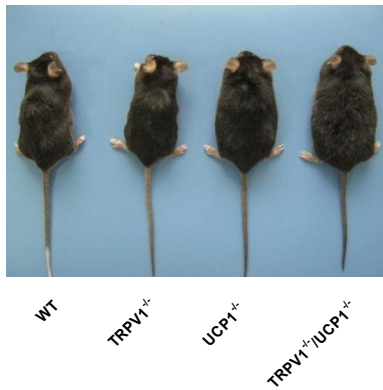

**D**

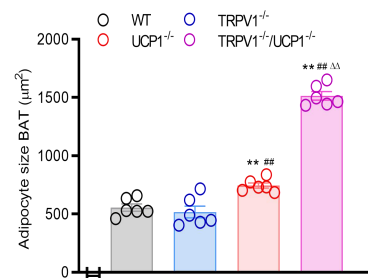

**E**

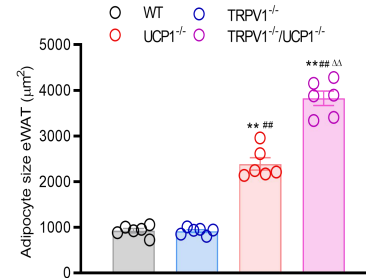

**F**

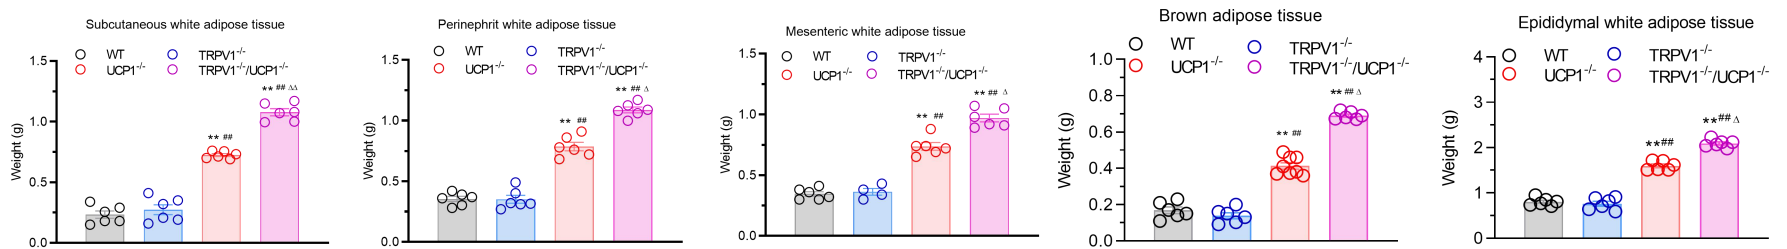

# Supplementary Figure 2

**A**

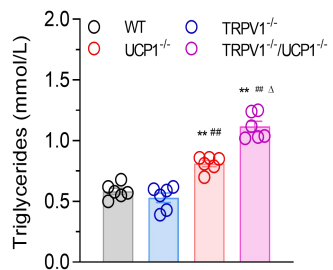

**B**

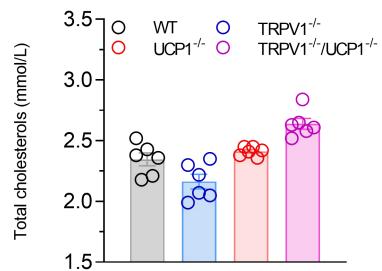

**C**

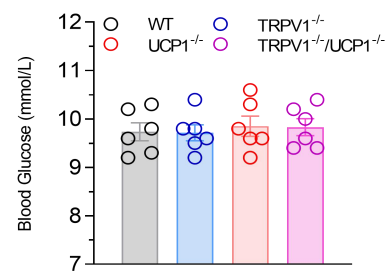

**D**

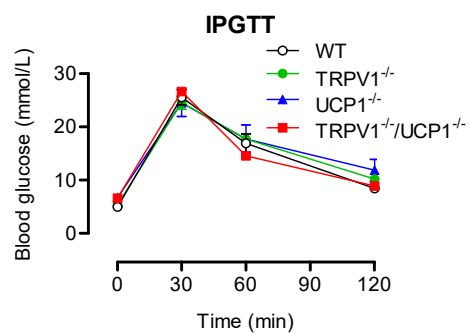

**E**

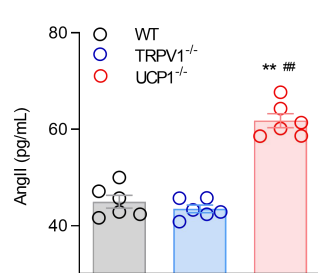

**F**

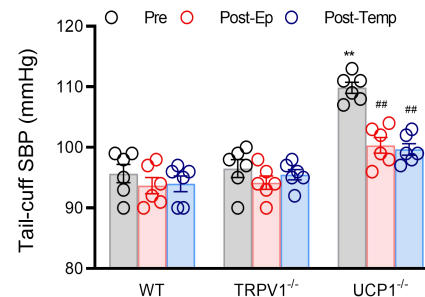

**G**

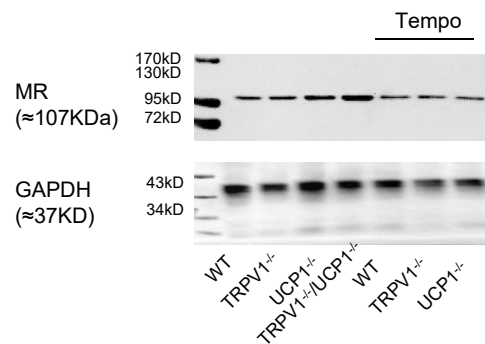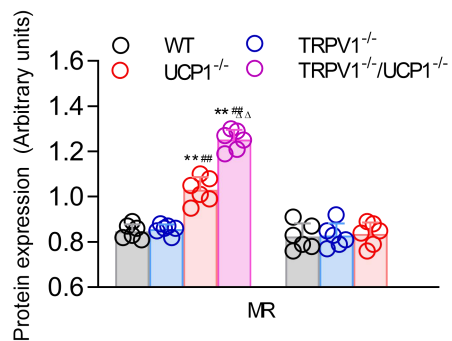

Supplement: 41440_2021_842_MOESM1_ESM.pdf [file 41440_2021_842_MOESM1_ESM.pdf]
